# Supplementary material
Source: PubMed Central journal article supplement (PMC5469520)
Supplement: np6b01156_si_001.pdf [file np6b01156_si_001.pdf]

## SUPPORTING INFORMATION

### **Comparison of Metabolomics Approaches for Evaluating the Variability of Complex Botanical Preparations: Green Tea (*Camellia sinensis*) as a Case Study**

Joshua J. Kellogg,<sup>†</sup> Tyler N. Graf,<sup>†</sup> Mary F. Paine,<sup>‡</sup> Jeannine S. McCune,<sup>§</sup> Olav M. Kvalheim,<sup>⊥</sup>  
Nicholas H. Oberlies,<sup>†</sup> and Nadja B. Cech<sup>†\*</sup>

<sup>†</sup> Department of Chemistry & Biochemistry, University of North Carolina at Greensboro, Greensboro,  
North Carolina 27412, United States

<sup>‡</sup> College of Pharmacy, Washington State University, Spokane, Washington 99202, United States

<sup>§</sup> Department of Pharmaceutics, University of Washington, Seattle, Washington 99202, United States

<sup>⊥</sup> Department of Chemistry, University of Bergen, Bergen 5020, Norway

## CONTENTS

**Table S1.** Selection and coding of commercial green tea products under investigation

**Table S2.** Green tea standards used in the quantification of green tea samples.

**Table S3.** Quantification of green tea standards in green tea methanol extract samples.

**Table S4.** Quantified constituents from NIST green tea leaf reference material (no. 3254).

**Table S5.** Correlation matrix for green tea samples.

**Figure S1.** Comparison of quantities of selected green tea constituents extracted in hot water versus methanol.

**Figure S2.** Comparison of  $^1\text{H}$  NMR spectroscopic profiles from green tea samples.

**Table S1.** Selection and coding of commercial green tea products under investigation.

| code             | product form   | selection criteria <sup>a</sup> |
|------------------|----------------|---------------------------------|
| T01              | leaf tea       | consumer sales <sup>36</sup>    |
| T02              | leaf tea       | quality report <sup>37</sup>    |
| T03              | leaf tea       | consumer sales <sup>36</sup>    |
| T04              | leaf tea       | quality report <sup>37</sup>    |
| T05              | leaf tea       | quality report <sup>37</sup>    |
| T06              | leaf tea       | quality report <sup>37</sup>    |
| T07              | leaf tea       | quality report <sup>37</sup>    |
| T08              | leaf tea       | quality report <sup>37</sup>    |
| T09              | leaf tea       | quality report <sup>37</sup>    |
| T10              | leaf tea       | quality report <sup>37</sup>    |
| T11              | powdered tea   | consumer sales <sup>36</sup>    |
| T12              | powdered tea   | quality report <sup>37</sup>    |
| T13              | leaf tea       | quality report <sup>37</sup>    |
| T14              | leaf tea       | quality report <sup>37</sup>    |
| T15              | tea supplement | extract report <sup>38</sup>    |
| T16              | leaf tea       | quality report <sup>37</sup>    |
| T17              | leaf tea       | quality report <sup>37</sup>    |
| T18              | leaf tea       | quality report <sup>37</sup>    |
| T19              | tea supplement | extract report <sup>38</sup>    |
| T20              | leaf tea       | quality report <sup>37</sup>    |
| T21              | leaf tea       | quality report <sup>37</sup>    |
| T22              | powdered tea   | quality report <sup>37</sup>    |
| T23 <sup>b</sup> | leaf tea       | non-green tea                   |
| T24 <sup>c</sup> | leaf tea       | consumer sales <sup>36</sup>    |
| T25              | tea supplement | extract report <sup>38</sup>    |
| T26 <sup>d</sup> | leaf tea       | NIST standard                   |
| T27 <sup>d</sup> | tea supplement | NIST standard                   |
| T28              | tea supplement | extract report <sup>38</sup>    |
| T29              | tea supplement | extract report <sup>38</sup>    |
| T30              | powdered tea   | consumer sales <sup>36</sup>    |
| T31              | powdered tea   | consumer sales <sup>36</sup>    |
| T32              | powdered tea   | consumer sales <sup>36</sup>    |
| T33              | leaf tea       | quality report <sup>37</sup>    |
| T34              | leaf tea       | quality report <sup>37</sup>    |
| T35              | tea supplement | extract report <sup>38</sup>    |
| T36              | tea supplement | extract report <sup>38</sup>    |
| T37 <sup>d</sup> | tea supplement | NIST standard                   |
| T38 <sup>c</sup> | leaf tea       | consumer sales <sup>36</sup>    |

<sup>a</sup> Selection criteria represent the basis for which the product was included in the dataset (quality report<sup>37</sup>, green tea extract consumer report,<sup>38</sup> consumer sales report,<sup>36</sup>). <sup>b</sup> Non-green tea negative control. <sup>c</sup> Green teas with botanical additives that served as partial negative controls. <sup>d</sup> NIST standard reference materials positive controls.

**Table S1.** Green tea standards used in the quantification of green tea samples described in Table 1.

|    | standard                     | compound class  | formula                                                      | [M+H] <sup>+</sup> | [M-H] <sup>-</sup> | calibration equation                         | R <sup>2</sup> |
|----|------------------------------|-----------------|--------------------------------------------------------------|--------------------|--------------------|----------------------------------------------|----------------|
| 1  | caffeic acid                 | phenolic acid   | C <sub>9</sub> H <sub>8</sub> O <sub>4</sub>                 | 181.0501           | 179.0344           | y=2.36×10 <sup>8</sup> x+4.5×10 <sup>5</sup> | 0.9988         |
| 2  | caffeine                     | purine alkaloid | C <sub>8</sub> H <sub>10</sub> N <sub>4</sub> O <sub>2</sub> | 195.0883           | 193.0726           | y=3.03×10 <sup>8</sup> x+6.4×10 <sup>5</sup> | 0.9973         |
| 3  | (+)-catechin                 | catechin        | C <sub>15</sub> H <sub>14</sub> O <sub>6</sub>               | 291.0869           | 289.0712           | y=6.50×10 <sup>7</sup> x+3.5×10 <sup>5</sup> | 0.9925         |
| 4  | chlorogenic acid             | phenolic acid   | C <sub>16</sub> H <sub>18</sub> O <sub>9</sub>               | 355.1029           | 353.0872           | y=1.31×10 <sup>8</sup> x+5.4×10 <sup>5</sup> | 0.9999         |
| 5  | coumaric acid                | phenolic acid   | C <sub>9</sub> H <sub>8</sub> O <sub>3</sub>                 | 165.0552           | 163.0395           | y=8.44×10 <sup>7</sup> x+2.1×10 <sup>5</sup> | 0.9969         |
| 6  | (-)-epicatechin              | catechin        | C <sub>15</sub> H <sub>14</sub> O <sub>6</sub>               | 291.0869           | 289.0712           | y=7.48×10 <sup>7</sup> x+1.6×10 <sup>5</sup> | 0.9971         |
| 7  | (-)-epicatechin gallate      | catechin        | C <sub>22</sub> H <sub>18</sub> O <sub>10</sub>              | 443.0978           | 441.0821           | y=5.75×10 <sup>7</sup> x+1.6×10 <sup>5</sup> | 0.9951         |
| 8  | (-)-epigallocatechin         | catechin        | C <sub>15</sub> H <sub>14</sub> O <sub>7</sub>               | 307.0818           | 305.0661           | y=6.55×10 <sup>7</sup> x+1.9×10 <sup>5</sup> | 0.9945         |
| 9  | (-)-epigallocatechin gallate | catechin        | C <sub>22</sub> H <sub>18</sub> O <sub>11</sub>              | 459.0927           | 457.077            | y=5.46×10 <sup>7</sup> x+2.8×10 <sup>5</sup> | 0.9998         |
| 10 | gallic acid                  | phenolic acid   | C <sub>7</sub> H <sub>6</sub> O <sub>5</sub>                 | 171.0294           | 169.0137           | y=1.64×10 <sup>8</sup> x+4.2×10 <sup>5</sup> | 0.9960         |
| 11 | (-)-gallocatechin            | catechin        | C <sub>15</sub> H <sub>14</sub> O <sub>7</sub>               | 307.0818           | 305.0661           | y=8.50×10 <sup>7</sup> x+5.2×10 <sup>5</sup> | 0.9977         |
| 12 | kaempferol                   | flavonol        | C <sub>15</sub> H <sub>10</sub> O <sub>6</sub>               | 287.0556           | 285.0399           | y=1.59×10 <sup>8</sup> x+4.3×10 <sup>5</sup> | 0.9957         |
| 13 | myricetin                    | flavonol        | C <sub>22</sub> H <sub>18</sub> O <sub>11</sub>              | 319.0454           | 317.0297           | y=2.78×10 <sup>7</sup> x+8.8×10 <sup>5</sup> | 0.9949         |
| 14 | quercetin                    | flavonol        | C <sub>15</sub> H <sub>10</sub> O <sub>6</sub>               | 303.0505           | 301.0348           | y=4.43×10 <sup>7</sup> x+1.5×10 <sup>5</sup> | 0.9970         |
| 15 | rutin                        | flavonol        | C <sub>27</sub> H <sub>30</sub> O <sub>16</sub>              | 611.1612           | 609.1455           | y=8.69×10 <sup>6</sup> x+2.0×10 <sup>5</sup> | 0.9966         |
| 16 | theanine                     | amino acid      | C <sub>7</sub> H <sub>14</sub> N <sub>2</sub> O <sub>3</sub> | 175.1083           | 173.0926           | y=3.05×10 <sup>8</sup> x+1.0×10 <sup>5</sup> | 0.9992         |

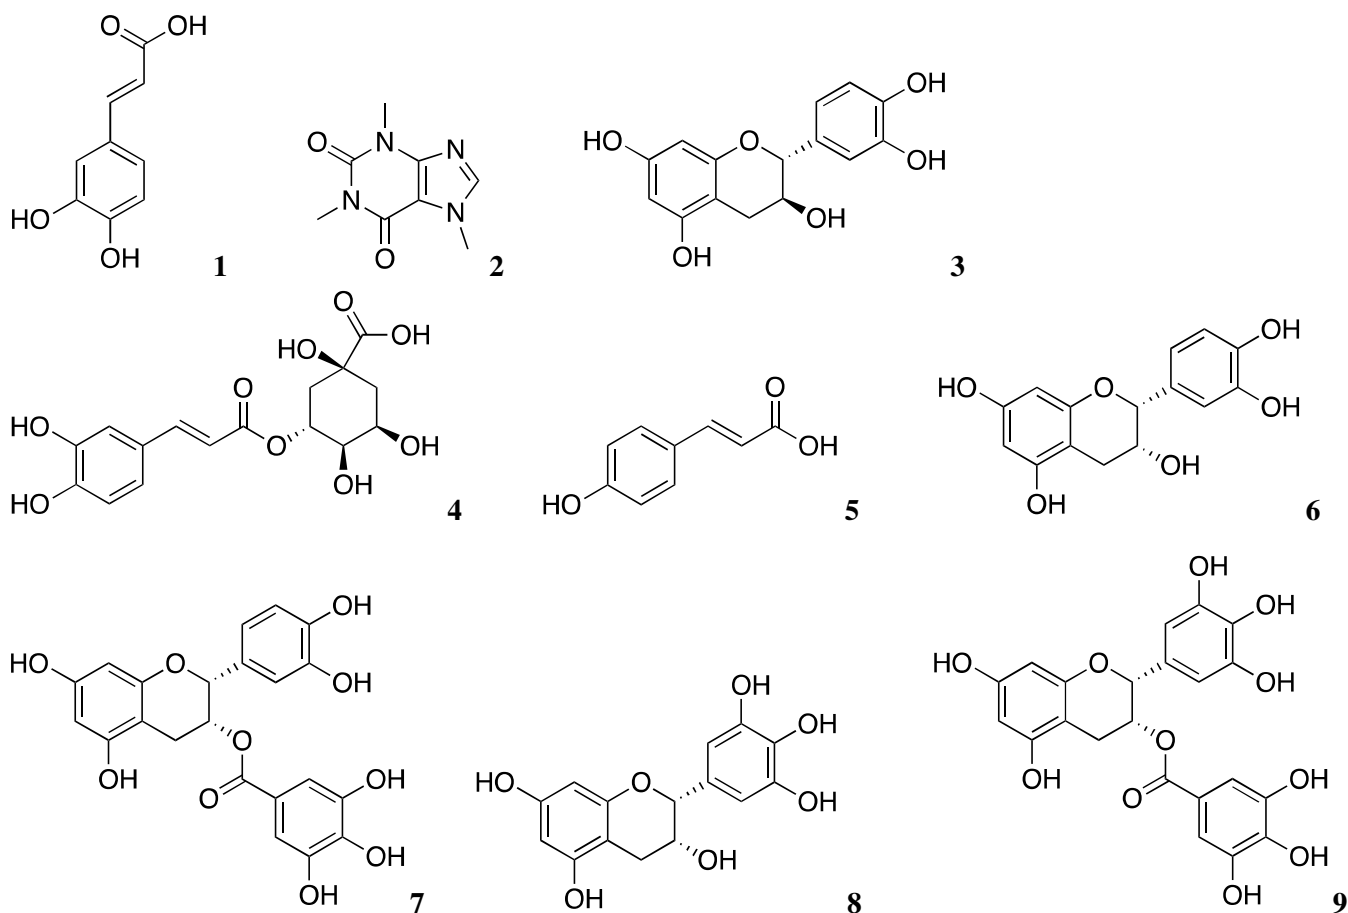

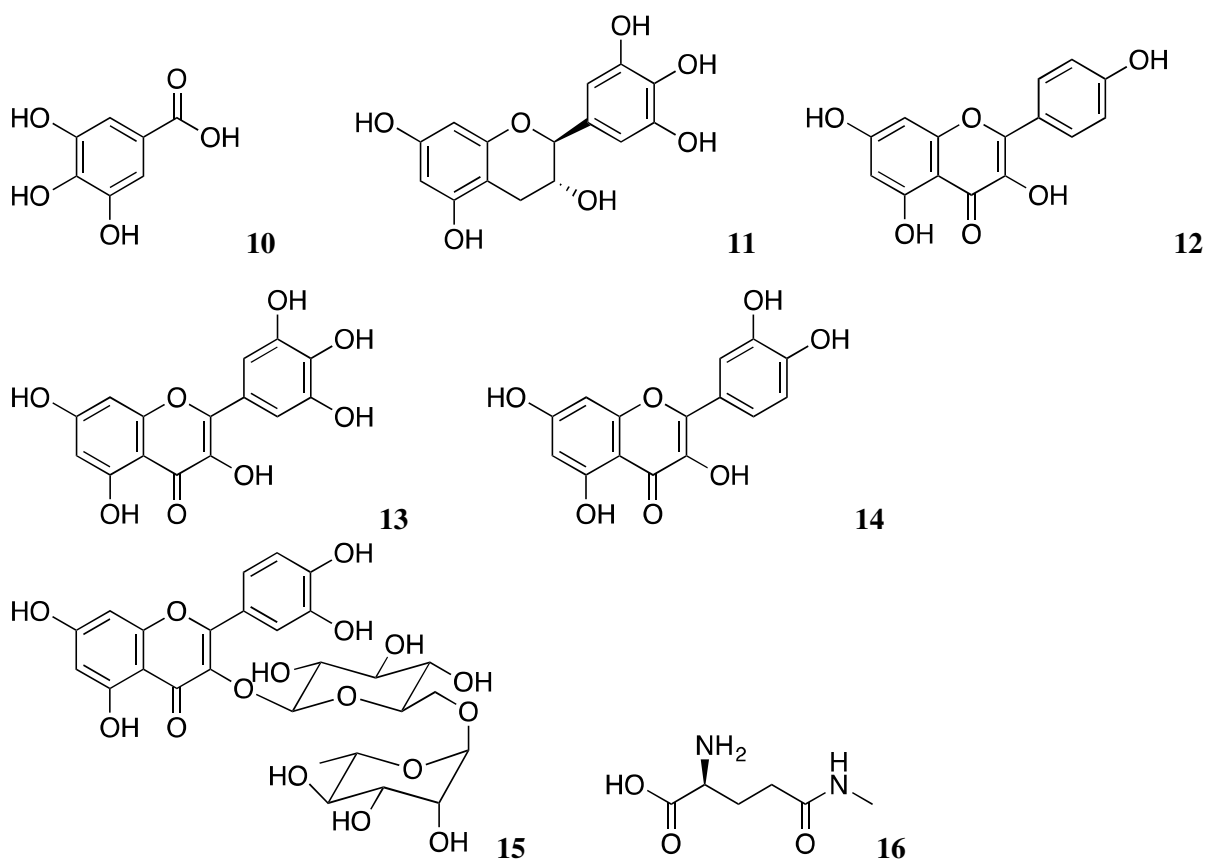

**Table S2.** Quantification of green tea standards in green tea methanol extract samples. Values given in  $\mu\text{g/mL}$  extract and represent the mean  $\pm$  SD of triplicate extractions. ND, not detected; # non-green tea negative control; ‡ NIST, standard reference material positive controls; § green teas with botanical additives.

| sample | caffeic acid          | caffeine           | catechin            | chlorogenic acid    | coumaric acid         | epicatechin         | epicatechin gallate | epigallocatechin    |
|--------|-----------------------|--------------------|---------------------|---------------------|-----------------------|---------------------|---------------------|---------------------|
| T01    | 0.0358 $\pm$ 0.0069   | 50.5 $\pm$ 1.2     | 0.966 $\pm$ 0.013   | 1.171 $\pm$ 0.036   | 0.0126 $\pm$ 0.0011   | 18.74 $\pm$ 0.49    | 28.10 $\pm$ 0.73    | 81.8 $\pm$ 1.6      |
| T02    | 0.0185 $\pm$ 0.0042   | 61.5 $\pm$ 1.0     | 0.641 $\pm$ 0.021   | 0.27 $\pm$ 0.12     | 0.0959 $\pm$ 0.0037   | 9.66 $\pm$ 0.13     | 26.92 $\pm$ 0.38    | 38.4 $\pm$ 1.0      |
| T03    | 0.0144 $\pm$ 0.0032   | 78.6 $\pm$ 5.1     | 1.481 $\pm$ 0.074   | 37.9 $\pm$ 1.9      | 0.0398 $\pm$ 0.0022   | 11.10 $\pm$ 0.65    | 50.76 $\pm$ 2.16    | 57.1 $\pm$ 4.2      |
| T04    | 0.04515 $\pm$ 0.00052 | 73.5 $\pm$ 1.1     | 0.745 $\pm$ 0.022   | 17.66 $\pm$ 0.26    | 0.0637 $\pm$ 0.0054   | 12.98 $\pm$ 0.31    | 41.39 $\pm$ 0.36    | 56.33 $\pm$ 0.77    |
| T05    | 0.0568 $\pm$ 0.0024   | 73.00 $\pm$ 0.43   | 0.676 $\pm$ 0.018   | 31.19 $\pm$ 0.88    | 0.0421 $\pm$ 0.0060   | 10.65 $\pm$ 0.64    | 55.21 $\pm$ 0.44    | 55.6 $\pm$ 1.5      |
| T06    | 0.0133 $\pm$ 0.0033   | 53.4 $\pm$ 1.8     | 1.228 $\pm$ 0.012   | 0.338 $\pm$ 0.012   | 0.1152 $\pm$ 0.0063   | 6.40 $\pm$ 0.21     | 19.44 $\pm$ 0.22    | 27.49 $\pm$ 0.88    |
| T07    | 0.0298 $\pm$ 0.0039   | 17.70 $\pm$ 0.28   | 1.275 $\pm$ 0.023   | 0.11 $\pm$ 0.41     | 0.07642 $\pm$ 0.00094 | 13.547 $\pm$ 0.049  | 35.10 $\pm$ 0.35    | 45.3 $\pm$ 1.6      |
| T08    | 0.01813 $\pm$ 0.00069 | 65.01 $\pm$ 0.56   | 1.42 $\pm$ 0.17     | 0.06 $\pm$ 0.16     | 0.08277 $\pm$ 0.00091 | 10.813 $\pm$ 0.054  | 35.44 $\pm$ 0.19    | 48.02 $\pm$ 0.43    |
| T09    | 0.03006 $\pm$ 0.00099 | 58.6 $\pm$ 1.1     | 1.357 $\pm$ 0.079   | 0.024 $\pm$ 0.092   | 0.0079 $\pm$ 0.0015   | 17.06 $\pm$ 0.96    | 33.57 $\pm$ 0.76    | 72.0 $\pm$ 1.9      |
| T10    | 0.0301 $\pm$ 0.0041   | 67.1 $\pm$ 1.7     | 1.198 $\pm$ 0.043   | 0.578 $\pm$ 0.059   | 0.0142 $\pm$ 0.0027   | 14.81 $\pm$ 0.74    | 32.32 $\pm$ 0.76    | 64.52 $\pm$ 0.42    |
| T11    | 0.02323 $\pm$ 0.00084 | 53.622 $\pm$ 0.062 | 0.997 $\pm$ 0.052   | 0.446 $\pm$ 0.042   | 0.0228 $\pm$ 0.0022   | 13.485 $\pm$ 0.021  | 30.04 $\pm$ 0.16    | 56.91 $\pm$ 0.79    |
| T12    | 0.02452 $\pm$ 0.00084 | 66.6 $\pm$ 2.1     | 1.109 $\pm$ 0.065   | 0.32 $\pm$ 0.13     | 0.0164 $\pm$ 0.0022   | 9.46 $\pm$ 0.17     | 31.97 $\pm$ 0.92    | 44.07 $\pm$ 0.77    |
| T13    | 0.0641 $\pm$ 0.0052   | 91.39 $\pm$ 2.74   | 1.298 $\pm$ 0.031   | 1.19 $\pm$ 0.20     | 0.1386 $\pm$ 0.0081   | 7.47 $\pm$ 0.71     | 32.86 $\pm$ 1.90    | 39.2 $\pm$ 2.9      |
| T14    | 0.0139 $\pm$ 0.0023   | 18.20 $\pm$ 0.64   | 1.025 $\pm$ 0.064   | 0.617 $\pm$ 0.086   | 0.0843 $\pm$ 0.0028   | 7.45 $\pm$ 0.22     | 20.43 $\pm$ 0.40    | 27.6 $\pm$ 1.0      |
| T15    | 0.01378 $\pm$ 0.0022  | 7.364 $\pm$ 0.083  | 1.3548 $\pm$ 0.0054 | 1.368 $\pm$ 0.035   | 0.2851 $\pm$ 0.0041   | 10.46 $\pm$ 0.11    | 67.90 $\pm$ 0.48    | 53.22 $\pm$ 0.42    |
| T16    | 0.01866 $\pm$ 0.00084 | 57.27 $\pm$ 0.61   | 1.0816 $\pm$ 0.0053 | 0.026 $\pm$ 0.088   | 0.0499 $\pm$ 0.0023   | 13.89 $\pm$ 0.29    | 31.73 $\pm$ 0.59    | 48.32 $\pm$ 0.62    |
| T17    | 0.0373 $\pm$ 0.0053   | 74.3 $\pm$ 1.7     | 1.706 $\pm$ 0.096   | 1.71 $\pm$ 0.10     | 0.1228 $\pm$ 0.0039   | 13.603 $\pm$ 0.089  | 30.50 $\pm$ 0.50    | 61.82 $\pm$ 0.95    |
| T18    | 0.0192 $\pm$ 0.0039   | 88.92 $\pm$ 0.82   | 1.3479 $\pm$ 0.0024 | 1.80 $\pm$ 0.054    | 0.0865 $\pm$ 0.0028   | 6.76 $\pm$ 0.18     | 45.03 $\pm$ 0.81    | 37.39 $\pm$ 0.59    |
| T19    | 0.046 $\pm$ 0.011     | 75.4 $\pm$ 1.1     | 0.946 $\pm$ 0.016   | 0.744 $\pm$ 0.075   | 0.168 $\pm$ 0.020     | 16.32 $\pm$ 0.29    | 25.67 $\pm$ 0.51    | 75.0 $\pm$ 1.2      |
| T20    | 0.0275 $\pm$ 0.0011   | 66.2 $\pm$ 1.4     | 0.747 $\pm$ 0.071   | 0.077 $\pm$ 0.082   | 0.0323 $\pm$ 0.0017   | 14.62 $\pm$ 0.26    | 36.63 $\pm$ 0.55    | 58.84 $\pm$ 0.54    |
| T21    | 0.03393 $\pm$ 0.00051 | 72.6 $\pm$ 2.0     | 1.046 $\pm$ 0.011   | 1.62 $\pm$ 0.17     | 0.06052 $\pm$ 0.00072 | 12.30 $\pm$ 0.10    | 36.09 $\pm$ 1.38    | 55.18 $\pm$ 0.60    |
| T22    | 0.0256 $\pm$ 0.0012   | 65.84 $\pm$ 0.70   | 1.632 $\pm$ 0.029   | 1.141 $\pm$ 0.015   | 0.02691 $\pm$ 0.00037 | 10.65 $\pm$ 0.13    | 33.79 $\pm$ 0.77    | 43.93 $\pm$ 1.92    |
| T23    | 0.028 $\pm$ 0.011     | 0.037 $\pm$ 0.011  | 1.365 $\pm$ 0.041   | 4.62 $\pm$ 0.92     | 1.27 $\pm$ 0.19       | 1.4169 $\pm$ 0.0045 | 1.6334 $\pm$ 0.0073 | 1.4127 $\pm$ 0.0033 |
| T24    | 0.0638 $\pm$ 0.0053   | 41.9 $\pm$ 1.9     | 1.065 $\pm$ 0.013   | 12.57 $\pm$ 0.85    | 0.446 $\pm$ 0.020     | 9.4 $\pm$ 1.0       | 27.1 $\pm$ 1.0      | 14.97 $\pm$ 0.97    |
| T25    | 0.04754 $\pm$ 0.00037 | 93.8 $\pm$ 1.5     | 0.94 $\pm$ 0.10     | 2.929 $\pm$ 0.098   | 0.093 $\pm$ 0.011     | 11.45 $\pm$ 0.10    | 21.95 $\pm$ 0.55    | 66.19 $\pm$ 0.36    |
| T26    | 0.02867 $\pm$ 0.00027 | 69.48 $\pm$ 0.52   | 1.145 $\pm$ 0.012   | 0.090 $\pm$ 0.051   | 0.0762 $\pm$ 0.0033   | 12.75 $\pm$ 0.20    | 35.56 $\pm$ 0.35    | 44.7 $\pm$ 1.1      |
| T27    | 0.028 $\pm$ 0.014     | 39.67 $\pm$ 0.62   | 1.411 $\pm$ 0.021   | 1.5843 $\pm$ 0.0089 | 0.2674 $\pm$ 0.0020   | 14.11 $\pm$ 0.21    | 63.7 $\pm$ 1.9      | 41.6 $\pm$ 9.5      |
| T28    | 0.0516 $\pm$ 0.0022   | 41.33 $\pm$ 15.88  | 0.989 $\pm$ 0.025   | 3.26 $\pm$ 0.18     | 0.338 $\pm$ 0.011     | 11.1 $\pm$ 4.8      | 25 $\pm$ 13         | 39 $\pm$ 15         |
| T29    | 0.0386 $\pm$ 0.0081   | 51.5 $\pm$ 4.4     | 1.08 $\pm$ 0.11     | 4.7 $\pm$ 1.8       | 0.0551 $\pm$ 0.0093   | 14.2 $\pm$ 1.6      | 14.8 $\pm$ 2.8      | 54.1 $\pm$ 3.8      |
| T30    | 0.0201 $\pm$ 0.0028   | 58.9 $\pm$ 2.9     | 1.50 $\pm$ 0.11     | 0.64 $\pm$ 0.38     | 0.0400 $\pm$ 0.0054   | 9.89 $\pm$ 0.25     | 23.08 $\pm$ 0.79    | 44.49 $\pm$ 0.21    |
| T31    | 0.0226 $\pm$ 0.0034   | 58.1 $\pm$ 6.4     | 1.129 $\pm$ 0.021   | 0.88 $\pm$ 0.66     | 0.0460 $\pm$ 0.0107   | 9.73 $\pm$ 0.41     | 25.42 $\pm$ 0.93    | 39.65 $\pm$ 3.45    |
| T32    | 0.0230 $\pm$ 0.0052   | 38.5 $\pm$ 2.8     | 0.881 $\pm$ 0.036   | 0.17 $\pm$ 1.1      | 0.0280 $\pm$ 0.0107   | 11.0 $\pm$ 1.1      | 27.6 $\pm$ 3.4      | 38.6 $\pm$ 9.9      |
| T33    | 0.0313 $\pm$ 0.0029   | 31.6 $\pm$ 7.9     | 0.676 $\pm$ 0.018   | 1.67 $\pm$ 0.83     | 0.0469 $\pm$ 0.0075   | 13.57 $\pm$ 0.79    | 33.72 $\pm$ 0.65    | 60.1 $\pm$ 1.7      |
| T34    | 0.046 $\pm$ 0.010     | 59 $\pm$ 14        | 1.632 $\pm$ 0.029   | 3.3 $\pm$ 1.2       | 0.044 $\pm$ 0.020     | 15.0 $\pm$ 1.1      | 34.85 $\pm$ 1.47    | 49.6 $\pm$ 9.2      |
| T35    | 0.0636 $\pm$ 0.0053   | 90 $\pm$ 18        | 1.462 $\pm$ 0.026   | 10.7 $\pm$ 3.8      | 0.096 $\pm$ 0.012     | 11.98 $\pm$ 0.43    | 38.13 $\pm$ 1.37    | 26.5 $\pm$ 1.5      |
| T36    | 0.028 $\pm$ 0.011     | 62 $\pm$ 14        | 1.11 $\pm$ 0.48     | 2.1 $\pm$ 1.3       | 0.1123 $\pm$ 0.0030   | 11.29 $\pm$ 0.21    | 38.32 $\pm$ 1.40    | 27.1 $\pm$ 5.3      |
| T37    | 0.0376 $\pm$ 0.0021   | 77 $\pm$ 19        | 0.973 $\pm$ 0.041   | 16 $\pm$ 14         | 0.1013 $\pm$ 0.0076   | 9.97 $\pm$ 0.50     | 28.8 $\pm$ 5.0      | 30.9 $\pm$ 4.8      |
| T38    | 0.0423 $\pm$ 0.0058   | 28.94 $\pm$ 0.95   | 1.0812 $\pm$ 0.0053 | 51.9 $\pm$ 1.4      | 0.0941 $\pm$ 0.0026   | 8.81 $\pm$ 0.36     | 17.2 $\pm$ 1.1      | 23.2 $\pm$ 2.8      |

Table S2 (con't)

| sample | epigallocatechin gallate | gallic acid      | gallo catechin  | kaempferol        | myrecetin     | quercetin       | rutin          | theanine          |
|--------|--------------------------|------------------|-----------------|-------------------|---------------|-----------------|----------------|-------------------|
| T01    | 59.91 ± 0.26             | 0.1537 ± 0.0057  | 7.22 ± 0.38     | 0.00201 ± 0.00056 | 0.858 ± 0.034 | 0.434 ± 0.011   | 6.34 ± 0.19    | 12.11 ± 0.38      |
| T02    | 52.48 ± 0.42             | 1.96 ± 0.33      | 3.42 ± 0.31     | 0.0597 ± 0.0047   | 0.109 ± 0.048 | 1.025 ± 0.063   | 4.98 ± 0.12    | 9.77 ± 0.31       |
| T03    | 73.72 ± 3.38             | 0.87 ± 0.10      | 5.06 ± 0.45     | 0.0142 ± 0.0017   | 0.513 ± 0.232 | 0.86 ± 0.119    | 10.59 ± 0.76   | 9.27 ± 0.45       |
| T04    | 67.02 ± 0.43             | 1.365 ± 0.041    | 4.99 ± 0.40     | 0.0459 ± 0.0034   | 0.506 ± 0.071 | 0.917 ± 0.018   | 14.131 ± 0.030 | 14.35 ± 0.40      |
| T05    | 80.34 ± 1.13             | 0.54 ± 0.31      | 4.92 ± 0.10     | 0.0138 ± 0.0016   | 0.205 ± 0.058 | 0.883 ± 0.035   | 5.72 ± 0.61    | 9.66 ± 0.10       |
| T06    | 43.56 ± 0.58             | 1.834 ± 0.034    | 2.47 ± 0.06     | 0.06730 ± 0.00049 | 0.18 ± 0.05   | 1.012 ± 0.013   | 3.26 ± 0.18    | 5.184 ± 0.056     |
| T07    | 59.9 ± 2.4               | 1.416 ± 0.058    | 4.50 ± 0.47     | 0.03786 ± 0.00059 | 0.606 ± 0.066 | 0.629 ± 0.003   | 9.02 ± 0.12    | 12.84 ± 0.47      |
| T08    | 66.32 ± 0.54             | 1.288 ± 0.039    | 4.26 ± 0.49     | 0.0258 ± 0.0010   | 0.654 ± 0.019 | 1.106 ± 0.009   | 4.85 ± 0.21    | 3.50 ± 0.49       |
| T09    | 60.96 ± 0.92             | 0.221 ± 0.024    | 6.37 ± 0.11     | 0.00230 ± 0.00073 | 0.166 ± 0.057 | 0.602 ± 0.018   | 2.64 ± 0.19    | 4.42 ± 0.11       |
| T10    | 60.76 ± 0.56             | 0.3905 ± 0.0024  | 5.713 ± 0.072   | 0.0419 ± 0.0062   | 0.19 ± 0.082  | 0.365 ± 0.012   | 4.253 ± 0.087  | 5.181 ± 0.072     |
| T11    | 57.95 ± 0.24             | 0.2281 ± 0.0042  | 5.042 ± 0.099   | 0.00510 ± 0.00066 | 0.321 ± 0.167 | 0.385 ± 0.004   | 5.94 ± 0.11    | 10.040 ± 0.099    |
| T12    | 58.7 ± 1.1               | 0.594 ± 0.029    | 3.92 ± 0.26     | 0.0119 ± 0.0013   | 0.097 ± 0.021 | 0.457 ± 0.018   | 2.80 ± 0.14    | 8.61 ± 0.26       |
| T13    | 63.5 ± 1.2               | 3.05 ± 0.30      | 3.49 ± 0.69     | 0.0440 ± 0.0029   | 0.207 ± 0.048 | 1.228 ± 0.064   | 3.97 ± 0.30    | 8.11 ± 0.69       |
| T14    | 42.47 ± 0.61             | 1.613 ± 0.027    | 2.48 ± 0.16     | 0.0391 ± 0.0015   | 0.184 ± 0.044 | 0.637 ± 0.009   | 6.78 ± 0.36    | 4.05 ± 0.16       |
| T15    | 98.7 ± 1.4               | 5.541 ± 0.047    | 5.0959 ± 0.0089 | 0.438 ± 0.013     | 0.205 ± 0.01  | 5.206 ± 0.136   | 0.225 ± 0.025  | 0.0502 ± 0.0010   |
| T16    | 54.22 ± 0.65             | 0.937 ± 0.017    | 4.291 ± 0.045   | 0.0204 ± 0.0015   | 0.211 ± 0.013 | 0.61 ± 0.11     | 12.27 ± 0.31   | 5.966 ± 0.045     |
| T17    | 64.35 ± 0.76             | 0.818 ± 0.029    | 5.47 ± 0.33     | 0.0383 ± 0.0022   | 0.18 ± 0.068  | 0.983 ± 0.025   | 2.276 ± 0.088  | 13.07 ± 0.33      |
| T18    | 76.44 ± 2.25             | 1.469 ± 0.076    | 3.3 ± 1.2       | 0.0569 ± 0.0022   | 0.104 ± 0.069 | 0.597 ± 0.013   | 3.55 ± 0.11    | 11.0 ± 1.2        |
| T19    | 66.2 ± 1.4               | 1.38 ± 0.37      | 6.625 ± 0.091   | 0.0948 ± 0.0047   | 0.189 ± 0.114 | 2.30 ± 0.10     | 2.20 ± 0.10    | 2.828 ± 0.092     |
| T20    | 63.45 ± 0.47             | 0.5472 ± 0.0054  | 5.21 ± 0.32     | 0.01642 ± 0.00065 | 0.452 ± 0.101 | 0.617 ± 0.016   | 6.22 ± 0.14    | 11.76 ± 0.32      |
| T21    | 64.96 ± 0.85             | 0.946 ± 0.028    | 4.89 ± 0.18     | 0.0399 ± 0.0062   | 0.232 ± 0.092 | 0.49 ± 0.14     | 6.84 ± 0.13    | 8.38 ± 0.18       |
| T22    | 61.1 ± 1.4               | 0.490 ± 0.022    | 4.56 ± 0.18     | 0.01320 ± 0.00084 | 0.723 ± 0.023 | 0.0069 ± 0.0021 | 3.68 ± 0.16    | 6.98 ± 0.18       |
| T23    | 1.363 ± 0.016            | 0.00139 ± 0.0045 | 0.0610 ± 0.0013 | ND                | ND            | ND              | ND             | 0.01568 ± 0.00096 |
| T24    | 33.5 ± 1.5               | 3.55 ± 0.27      | 1.372 ± 0.16    | 0.0132 ± 0.0014   | 0.089 ± 0.02  | 0.1949 ± 0.0062 | 5.89 ± 0.55    | 1.39 ± 0.16       |
| T25    | 68.36 ± 0.56             | 2.21 ± 0.49      | 5.8538 ± 0.0083 | 0.2518 ± 0.0040   | 0.904 ± 0.129 | 2.647 ± 0.041   | 9.87 ± 0.25    | 0.7459 ± 0.0082   |
| T26    | 60.83 ± 0.62             | 2.609 ± 0.047    | 3.997 ± 0.010   | 0.0203 ± 0.0011   | 0.896 ± 0.056 | 0.5190 ± 0.0054 | 4.140 ± 0.084  | 0.242 ± 0.013     |
| T27    | 107.8 ± 1.4              | 2.8064 ± 0.0023  | 5.1826 ± 0.0023 | 0.2929 ± 0.0014   | 0.473 ± 0.042 | 2.88 ± 0.57     | 0.440 ± 0.015  | 0.1453 ± 0.0019   |
| T28    | 55 ± 24                  | 3.83 ± 0.33      | 3.49 ± 0.33     | 2.21 ± 0.49       | 0.211 ± 0.013 | 1.79 ± 0.33     | 1.834 ± 0.034  | 1.357 ± 0.079     |
| T29    | 49.47 ± 0.40             | 3.1 ± 1.1        | 4.8 ± 1.2       | 0.192 ± 0.065     | 0.049 ± 1.158 | 0.602 ± 0.018   | 2.8 ± 1.2      | 1.198 ± 0.043     |
| T30    | 49.2 ± 1.2               | 1.086 ± 0.043    | 3.989 ± 0.090   | 0.0220 ± 0.0019   | 0.089 ± 0.09  | 0.365 ± 0.012   | 0.201 ± 0.090  | 6.3 ± 1.8         |
| T31    | 49.2 ± 1.5               | 1.02 ± 0.32      | 4.03 ± 0.32     | 0.0142 ± 0.0033   | 0.084 ± 0.315 | 0.6368 ± 0.0091 | 0.73 ± 0.32    | 8.0 ± 1.3         |
| T32    | 49.4 ± 6.9               | 0.59 ± 0.33      | 4.1 ± 0.33      | 0.0085 ± 0.0039   | 0.05 ± 0.325  | 0.983 ± 0.025   | 1.91 ± 0.33    | 1.091 ± 0.040     |
| T33    | 61.4 ± 2.5               | 0.7 ± 1.2        | 5.3 ± 1.2       | 0.0155 ± 0.0039   | 0.029 ± 1.158 | 0.6371 ± 0.0091 | 0.40 ± 0.21    | 1.02 ± 0.18       |
| T34    | 60.6 ± 5.2               | 0.964 ± 0.052    | 4.403 ± 0.092   | 0.019 ± 0.012     | 0.063 ± 0.09  | 1.025 ± 0.063   | 0.792 ± 0.090  | 0.14 ± 0.12       |
| T35    | 75.1 ± 2.3               | 2.12 ± 0.32      | 2.5 ± 0.32      | 0.079 ± 0.027     | 0.044 ± 0.003 | 1.55 ± 0.32     | 0.41 ± 0.12    | 2.26 ± 0.26       |
| T36    | 74.5 ± 4.3               | 5.8 ± 4.5        | 3.36 ± 0.50     | 0.165 ± 0.017     | 0.087 ± 0.036 | 2.95 ± 0.16     | 1.49 ± 0.34    | 1.35 ± 0.50       |
| T37    | 53.1 ± 8.5               | 12.7 ± 4.4       | 3.49 ± 0.69     | 0.152 ± 0.053     | 0.093 ± 0.019 | 2.61 ± 0.56     | 2.84 ± 0.75    | 3.13 ± 0.69       |
| T38    | 34.0 ± 2.4               | 1.220 ± 0.018    | 2.63 ± 0.12     | 0.01452 ± 0.00089 | 0.099 ± 0.005 | 1.105 ± 0.051   | 5.02 ± 0.18    | 5.03 ± 0.12       |

**Table S3.** Quantified constituents from NIST green tea leaf reference material (no. 3254)<sup>a</sup>

| standard                     | methanol extract<br>(mg/g dry tea) | NIST CoA <sup>b</sup><br>(mg/g dry tea) |
|------------------------------|------------------------------------|-----------------------------------------|
| (-)-epicatechin              | 6.25 ± 0.05                        | 9.0 ± 1.6                               |
| (-)-epicatechin gallate      | 12.36 ± 0.13                       | 12.7 ± 1.2                              |
| (-)-epigallocatechin         | 18.43 ± 0.82                       | 25.2 ± 4.5                              |
| (-)-epigallocatechin gallate | 24.69 ± 0.29                       | 52.0 ± 2.2                              |
| (-)-gallocatechin            | 3.40 ± 0.12                        | 2.4 ± 1.1                               |
| gallic acid                  | 1.06 ± 0.02                        | 1.12 ± 0.61                             |

<sup>a</sup> values are calculated as average of triplicate runs ± standard deviation (SD)

<sup>b</sup> values obtained from the provided NIST Certificate of Analysis<sup>38</sup>



**Table S4.** Correlation matrix for green tea samples. Correlation was based upon the averaged metabolomic profile for each sample, and calculated from the reproduced correlation coefficient matrix comprised of a four principal component model.

|     | T01    | T02    | T03    | T04    | T05    | T06    | T07    | T08    | T09    | T10    | T11    | T12    | T13    | T14    | T15    | T16    | T17    | T18    | T19    | T20    | T21    | T22    | T23    | T24    | T25    | T26    | T27    | T28    | T29    | T30    | T31    | T32    | T33    | T34    | T35    | T36    | T37    | T38    |
|-----|--------|--------|--------|--------|--------|--------|--------|--------|--------|--------|--------|--------|--------|--------|--------|--------|--------|--------|--------|--------|--------|--------|--------|--------|--------|--------|--------|--------|--------|--------|--------|--------|--------|--------|--------|--------|--------|--------|
| T01 | 1.000  | 0.465  | -0.196 | 0.062  | -0.236 | 0.086  | 0.513  | 0.891  | 0.987  | 0.944  | 0.991  | 0.934  | 0.615  | 0.244  | -0.772 | 0.841  | 0.762  | 0.438  | -0.642 | 0.978  | 0.591  | 0.723  | -0.374 | -0.283 | -0.649 | 0.676  | -0.860 | -0.767 | -0.450 | 0.533  | 0.609  | 0.793  | 0.581  | 0.683  | -0.936 | -0.608 | -0.662 | 0.147  |
| T02 | 0.465  | 1.000  | 0.595  | 0.739  | 0.569  | 0.901  | 0.919  | 0.815  | 0.372  | 0.707  | 0.583  | 0.730  | 0.948  | 0.896  | -0.059 | 0.834  | -0.208 | 0.571  | -0.952 | 0.523  | 0.841  | 0.872  | -0.007 | 0.461  | -0.916 | 0.974  | -0.426 | -0.891 | -1.000 | -0.436 | -0.355 | -0.074 | -0.440 | -0.317 | -0.736 | -0.983 | -0.954 | 0.544  |
| T03 | -0.196 | 0.595  | 1.000  | 0.966  | 0.999  | 0.608  | 0.725  | 0.192  | -0.192 | 0.128  | -0.090 | -0.001 | 0.610  | 0.398  | 0.737  | 0.099  | -0.567 | 0.714  | -0.321 | -0.016 | 0.675  | 0.527  | -0.325 | 0.164  | -0.223 | 0.585  | 0.451  | -0.187 | -0.615 | -0.910 | -0.877 | -0.752 | -0.817 | -0.775 | -0.023 | -0.451 | -0.333 | -0.110 |
| T04 | 0.062  | 0.739  | 0.966  | 1.000  | 0.955  | 0.657  | 0.875  | 0.435  | 0.060  | 0.380  | 0.170  | 0.250  | 0.787  | 0.487  | 0.543  | 0.331  | -0.388 | 0.834  | -0.508 | 0.238  | 0.842  | 0.728  | -0.412 | 0.112  | -0.411 | 0.774  | 0.225  | -0.403 | -0.755 | -0.791 | -0.736 | -0.558 | -0.687 | -0.616 | -0.275 | -0.629 | -0.524 | -0.053 |
| T05 | -0.236 | 0.569  | 0.999  | 0.955  | 1.000  | 0.597  | 0.696  | 0.153  | -0.231 | 0.088  | -0.130 | -0.041 | 0.578  | 0.382  | 0.763  | 0.061  | -0.593 | 0.691  | -0.290 | -0.056 | 0.644  | 0.492  | -0.308 | 0.172  | -0.192 | 0.551  | 0.484  | -0.152 | -0.589 | -0.924 | -0.894 | -0.778 | -0.833 | -0.795 | 0.017  | -0.420 | -0.301 | -0.118 |
| T06 | 0.086  | 0.901  | 0.608  | 0.657  | 0.597  | 1.000  | 0.709  | 0.511  | -0.039 | 0.347  | 0.219  | 0.432  | 0.725  | 0.967  | 0.148  | 0.603  | -0.580 | 0.269  | -0.817 | 0.116  | 0.567  | 0.578  | 0.348  | 0.776  | -0.798 | 0.590  | -0.212 | -0.700 | -0.903 | -0.632 | -0.578 | -0.343 | -0.702 | -0.608 | -0.431 | -0.837 | -0.804 | 0.715  |
| T07 | 0.513  | 0.919  | 0.725  | 0.875  | 0.696  | 0.709  | 1.000  | 0.816  | 0.480  | 0.767  | 0.613  | 0.687  | 0.986  | 0.652  | 0.070  | 0.737  | -0.050 | 0.848  | -0.817 | 0.635  | 0.983  | 0.963  | -0.393 | 0.108  | -0.747 | 0.977  | -0.269 | -0.775 | -0.924 | -0.452 | -0.368 | -0.110 | -0.371 | -0.255 | -0.705 | -0.892 | -0.835 | 0.172  |
| T08 | 0.891  | 0.815  | 0.192  | 0.435  | 0.153  | 0.511  | 0.816  | 1.000  | 0.839  | 0.982  | 0.945  | 0.980  | 0.893  | 0.607  | -0.520 | 0.970  | 0.394  | 0.600  | -0.901 | 0.911  | 0.830  | 0.927  | -0.272 | 0.033  | -0.884 | 0.899  | -0.766 | -0.951 | -0.806 | 0.116  | 0.207  | 0.471  | 0.150  | 0.280  | -0.985 | -0.898 | -0.915 | 0.352  |
| T09 | 0.987  | 0.372  | -0.192 | 0.060  | -0.231 | -0.039 | 0.480  | 0.839  | 1.000  | 0.919  | 0.963  | 0.873  | 0.566  | 0.103  | -0.726 | 0.754  | 0.830  | 0.495  | -0.535 | 0.983  | 0.584  | 0.698  | -0.505 | -0.434 | -0.531 | 0.655  | -0.780 | -0.670 | -0.359 | 0.557  | 0.629  | 0.786  | 0.634  | 0.726  | -0.878 | -0.513 | -0.559 | -0.015 |
| T10 | 0.944  | 0.707  | 0.128  | 0.380  | 0.088  | 0.347  | 0.767  | 0.982  | 0.919  | 1.000  | 0.976  | 0.966  | 0.840  | 0.445  | -0.556 | 0.918  | 0.543  | 0.644  | -0.802 | 0.972  | 0.816  | 0.910  | -0.416 | -0.155 | -0.781 | 0.879  | -0.754 | -0.878 | -0.698 | 0.224  | 0.313  | 0.552  | 0.288  | 0.409  | -0.974 | -0.803 | -0.823 | 0.192  |
| T11 | 0.991  | 0.583  | -0.090 | 0.170  | -0.130 | 0.219  | 0.613  | 0.945  | 0.963  | 0.976  | 1.000  | 0.971  | 0.711  | 0.364  | -0.720 | 0.903  | 0.667  | 0.488  | -0.738 | 0.979  | 0.672  | 0.798  | -0.342 | -0.186 | -0.739 | 0.755  | -0.858 | -0.844 | -0.569 | 0.423  | 0.505  | 0.718  | 0.465  | 0.578  | -0.974 | -0.711 | -0.756 | 0.222  |
| T12 | 0.934  | 0.730  | -0.001 | 0.250  | -0.041 | 0.432  | 0.687  | 0.980  | 0.873  | 0.966  | 0.971  | 1.000  | 0.792  | 0.574  | -0.676 | 0.979  | 0.484  | 0.446  | -0.872 | 0.914  | 0.703  | 0.835  | -0.171 | 0.046  | -0.877 | 0.794  | -0.878 | -0.946 | -0.716 | 0.284  | 0.370  | 0.618  | 0.292  | 0.417  | -0.999 | -0.841 | -0.883 | 0.422  |
| T13 | 0.615  | 0.948  | 0.610  | 0.787  | 0.578  | 0.725  | 0.986  | 0.893  | 0.566  | 0.840  | 0.711  | 0.792  | 1.000  | 0.710  | -0.086 | 0.839  | 0.025  | 0.780  | -0.894 | 0.708  | 0.965  | 0.981  | -0.318 | 0.154  | -0.838 | 0.983  | -0.423 | -0.868 | -0.949 | -0.336 | -0.247 | 0.027  | -0.277 | -0.151 | -0.805 | -0.946 | -0.909 | 0.283  |
| T14 | 0.244  | 0.896  | 0.398  | 0.487  | 0.382  | 0.967  | 0.652  | 0.607  | 0.103  | 0.445  | 0.364  | 0.574  | 0.710  | 1.000  | -0.103 | 0.729  | -0.426 | 0.155  | -0.892 | 0.229  | 0.513  | 0.577  | 0.438  | 0.797  | -0.896 | 0.571  | -0.439 | -0.807 | -0.891 | -0.416 | -0.357 | -0.109 | -0.514 | -0.410 | -0.566 | -0.876 | -0.875 | 0.843  |
| T15 | -0.772 | -0.059 | 0.737  | 0.543  | 0.763  | 0.148  | 0.070  | -0.520 | -0.726 | -0.556 | -0.720 | -0.676 | -0.086 | -0.103 | 1.000  | -0.591 | -0.737 | 0.231  | 0.358  | -0.625 | 0.025  | -0.174 | -0.135 | 0.078  | 0.434  | -0.104 | 0.928  | 0.504  | 0.035  | -0.859 | -0.892 | -0.969 | -0.793 | -0.846 | 0.658  | 0.240  | 0.356  | -0.377 |
| T16 | 0.841  | 0.834  | 0.099  | 0.331  | 0.061  | 0.603  | 0.737  | 0.970  | 0.754  | 0.918  | 0.903  | 0.979  | 0.839  | 0.729  | -0.591 | 1.000  | 0.297  | 0.411  | -0.952 | 0.821  | 0.715  | 0.841  | -0.033 | 0.238  | -0.957 | 0.806  | -0.843 | -0.992 | -0.821 | 0.133  | 0.220  | 0.489  | 0.115  | 0.246  | -0.976 | -0.921 | -0.957 | 0.564  |
| T17 | 0.762  | -0.208 | -0.567 | -0.388 | -0.593 | -0.580 | -0.050 | 0.394  | 0.830  | 0.543  | 0.667  | 0.484  | 0.025  | -0.426 | -0.737 | 0.297  | 1.000  | 0.170  | 0.006  | 0.721  | 0.105  | 0.209  | -0.519 | -0.728 | -0.014 | 0.161  | -0.573 | -0.174 | 0.222  | 0.855  | 0.881  | 0.878  | 0.936  | 0.958  | -0.485 | 0.049  | -0.018 | -0.334 |
| T18 | 0.438  | 0.571  | 0.714  | 0.834  | 0.691  | 0.269  | 0.848  | 0.600  | 0.495  | 0.644  | 0.488  | 0.446  | 0.780  | 0.155  | 0.231  | 0.411  | 0.170  | 1.000  | -0.421 | 0.615  | 0.916  | 0.834  | -0.810 | -0.393 | -0.322 | 0.861  | 0.017  | -0.413 | -0.582 | -0.361 | -0.295 | -0.138 | -0.186 | -0.111 | -0.475 | -0.536 | -0.455 | -0.375 |
| T19 | -0.642 | -0.952 | -0.321 | -0.508 | -0.290 | -0.817 | -0.817 | -0.901 | -0.535 | -0.802 | -0.738 | -0.872 | -0.894 | -0.892 | 0.358  | -0.952 | 0.006  | -0.421 | 1.000  | -0.644 | -0.749 | -0.841 | -0.088 | -0.455 | 0.994  | -0.821 | 0.680  | 0.983  | 0.944  | 0.156  | 0.072  | -0.213 | 0.191  | 0.061  | 0.871  | 0.989  | 0.999  | -0.664 |
| T20 | 0.978  | 0.523  | -0.016 | 0.238  | -0.056 | 0.116  | 0.635  | 0.911  | 0.983  | 0.972  | 0.979  | 0.914  | 0.708  | 0.229  | -0.625 | 0.821  | 0.721  | 0.615  | -0.644 | 1.000  | 0.722  | 0.818  | -0.528 | -0.359 | -0.626 | 0.783  | -0.745 | -0.754 | -0.512 | 0.396  | 0.477  | 0.670  | 0.480  | 0.586  | -0.923 | -0.641 | -0.669 | 0.024  |
| T21 | 0.591  | 0.841  | 0.675  | 0.842  | 0.644  | 0.567  | 0.983  | 0.830  | 0.584  | 0.816  | 0.672  | 0.703  | 0.965  | 0.513  | 0.025  | 0.715  | 0.105  | 0.916  | -0.749 | 0.722  | 1.000  | 0.978  | -0.547 | -0.076 | -0.673 | 0.990  | -0.277 | -0.733 | -0.846 | -0.348 | -0.263 | -0.022 | -0.237 | -0.124 | -0.724 | -0.829 | -0.773 | 0.023  |
| T22 | 0.723  | 0.872  | 0.527  | 0.728  | 0.492  | 0.578  | 0.963  | 0.927  | 0.698  | 0.910  | 0.798  | 0.835  | 0.981  | 0.577  | -0.174 | 0.841  | 0.209  | 0.834  | -0.841 | 0.818  | 0.978  | 1.000  | -0.460 | -0.029 | -0.784 | 0.997  | -0.470 | -0.847 | -0.871 | -0.196 | -0.105 | 0.155  | -0.110 | 0.014  | -0.850 | -0.893 | -0.862 | 0.154  |
| T23 | -0.374 | -0.007 | -0.325 | -0.412 | -0.308 | 0.348  | -0.393 | -0.272 | -0.505 | -0.416 | -0.342 | -0.171 | -0.318 | 0.438  | -0.135 | -0.033 | -0.519 | -0.810 | -0.088 | -0.528 | -0.547 | -0.460 | 1.000  | 0.855  | -0.173 | -0.478 | -0.146 | -0.024 | 0.017  | -0.034 | -0.065 | -0.075 | -0.247 | -0.263 | 0.200  | 0.012  | -0.047 | 0.800  |
| T24 | -0.283 | 0.461  | 0.164  | 0.112  | 0.172  | 0.776  | 0.108  | 0.033  | -0.434 | -0.155 | -0.186 | 0.046  | 0.154  | 0.797  | 0.078  | 0.238  | -0.728 | -0.393 | -0.455 | -0.359 | -0.076 | -0.029 | 0.855  | 1.000  | -0.496 | -0.029 | -0.125 | -0.336 | -0.458 | -0.433 | -0.430 | -0.321 | -0.610 | -0.577 | -0.028 | -0.408 | -0.420 | 0.888  |
| T25 | -0.649 | -0.916 | -0.223 | -0.411 | -0.192 | -0.798 | -0.747 | -0.884 | -0.531 | -0.781 | -0.739 | -0.877 | -0.838 | -0.896 | 0.434  | -0.957 | -0.014 | -0.322 | 0.994  | -0.626 | -0.673 | -0.784 | -0.173 | -0.496 | 1.000  | -0.758 | 0.738  | 0.984  | 0.906  | 0.083  | 0.002  | -0.276 | 0.138  | 0.010  | 0.872  | 0.966  | 0.989  | -0.728 |
| T26 | 0.676  | 0.974  | 0.585  | 0.774  | 0.551  | 0.590  | 0.977  | 0.899  | 0.655  | 0.879  | 0.755  | 0.794  | 0.983  | 0.571  | -0.104 | 0.806  | 0.161  | 0.861  | -0.821 | 0.783  | 0.990  | 0.997  | -0.478 | -0.029 | -0.758 | 1.000  | -0.407 | -0.818 | -0.875 | -0.258 | -0.168 | 0.089  | -0.165 | -0.044 | -0.811 | -0.883 | -0.843 | 0.124  |
| T27 | -0.860 | -0.426 | 0.451  | 0.225  | 0.484  | -0.212 | -0.269 | -0.766 | -0.780 | -0.754 | -0.858 | -0.878 | -0.423 | -0.439 | 0.928  | -0.843 | -0.573 | 0.017  | 0.680  | -0.745 | -0.277 | -0.470 | -0.146 | -0.125 | 0.738  | -0.407 | 1.000  | 0.788  | 0.404  | -0.611 | -0.671 | -0.845 | -0.545 | -0.638 | 0.863  | 0.583  | 0.678  | -0.565 |
| T28 | -0.767 | -0.891 | -0.187 | -0.403 | -0.152 | -0.700 | -0.775 | -0.951 | -0.670 | -0.878 | -0.844 | -0.946 | -0.868 | -0.807 | 0.504  | -0.992 | -0.174 | -0.413 | 0.983  | -0.754 | -0.733 | -0.847 |        |        |        |        |        |        |        |        |        |        |        |        |        |        |        |        |

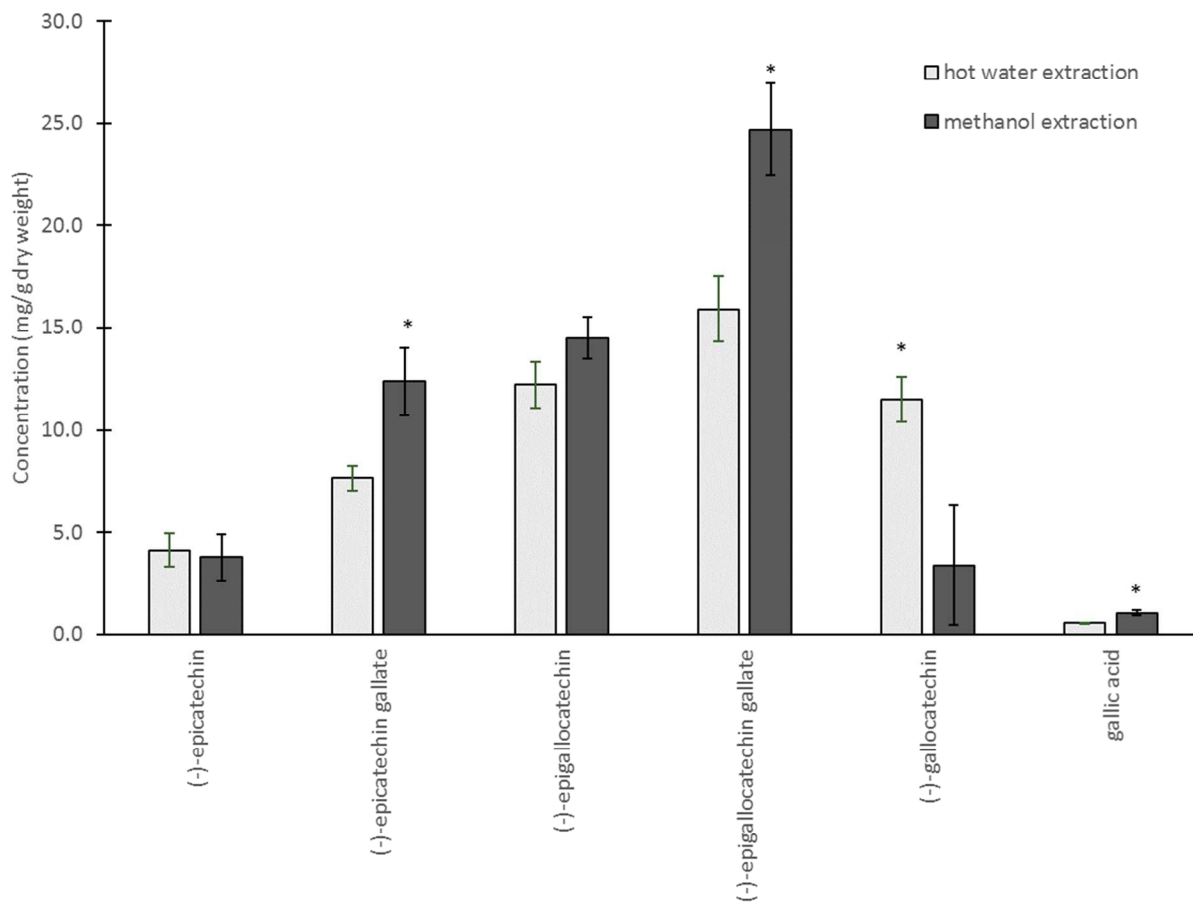

**Figure S1.** Comparison of quantities of selected green tea constituents extracted in hot water versus methanol. Triplicate extractions were conducted on a sample of green tea from the NIST (no. 3254). The mean concentration among triplicate extracts as determined by linear regression of the relevant calibration curve is reported. Error bars represent standard deviation(SD). \* indicates significantly differing concentrations, as determined by the student's t-test, with  $p < 0.05$ .

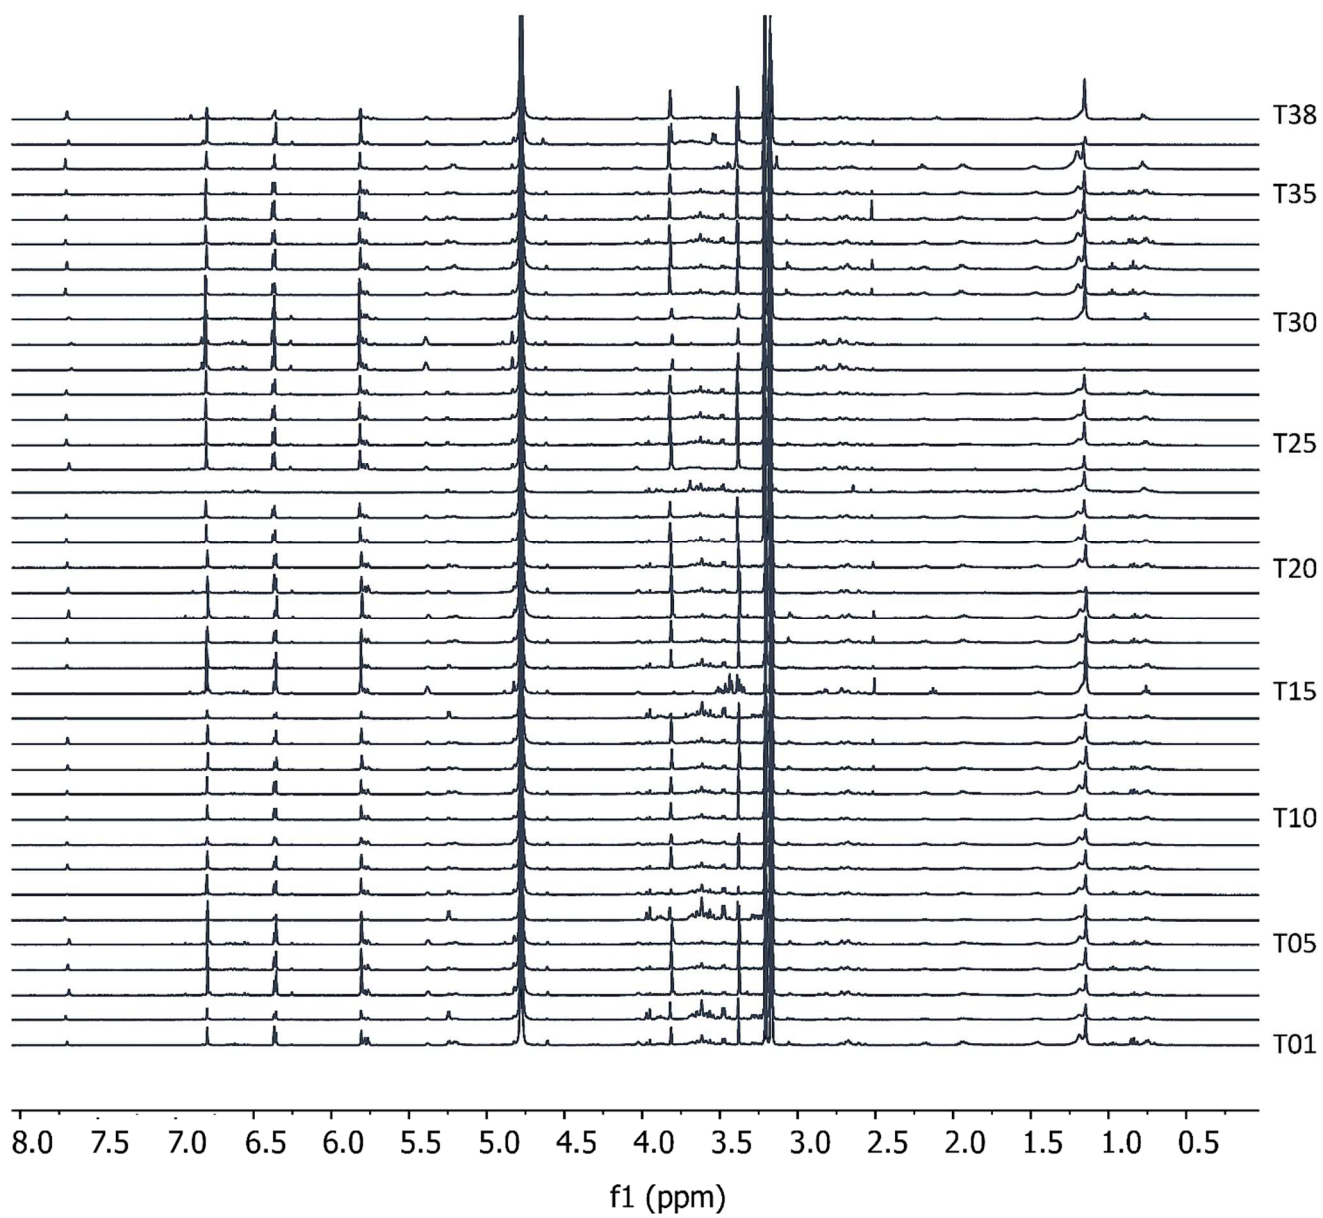

**Figure S2.** Untargeted <sup>1</sup>H-NMR spectra for all 38 tea samples. Spectra were acquired in CD<sub>3</sub>OD at a concentration of 10 mg/mL.
